1 **Avobenzonone, Guaiazulene and Tioxolone identified as potent autophagy inducers in a**  
2 **high-throughput image based screen for autophagy flux**

3

4 Surendra Kumar Prajapat, Chandru Subramani <sup>1</sup>, Puja Sharma, Sudhanshu Vrati & Manjula

5 Kalia\*

6

7 Regional Centre for Biotechnology, NCR Biotech Science Cluster, Faridabad, 121001,

8 Haryana, India

9

10 \*Correspondence: Manjula Kalia, [manjula@rcb.res.in](mailto:manjula@rcb.res.in)

11

12 <sup>1</sup>Present address: Department of Pathology, University of Texas medical branch, Galveston,

13 Texas 77550

14

15 **Keywords:** FDA drugs; GFP-LC3-RFP; High content screening; Microsource spectrum

16 library; mTOR

17 **Abstract**

18 Autophagy is a conserved intracellular degradation pathway that is essential for maintaining  
19 cellular homeostasis. Given its critical role in several disease conditions, recent studies are  
20 focussed on identifying drugs/small molecules with autophagy modulating capacity for  
21 potential clinical applications. Here, we describe the development and characterisation of a  
22 quantitative image-based high content screening platform for autophagy flux measurements  
23 using the human melanoma A375 cell line that stably expresses the GFP-LC3-RFP probe.  
24 The GFP-LC3 is incorporated into autophagosomes, while RFP serves an internal control.  
25 The GFP/RFP fluorescence intensity ratio gives an accurate indication of autophagy  
26 induction (low ratio) vs blockage of autophagy flux (high ratio), and was validated with the  
27 autophagy inducer Torin1 and inhibitor Bafilomycin A<sub>1</sub>. This assay was used to screen the  
28 Spectrum collection library comprising of 2560 compounds, to identify autophagy  
29 modulators. In addition to known autophagy effectors, several novel autophagy inducers and  
30 inhibitors were identified in our study. Further three FDA approved drugs that are widely  
31 used in skin-care products: Avobenzone, Guaiazulene and Tioxolone, were validated as  
32 potent autophagy inducers that function in an mTOR independent manner.

33

34 **Abbreviations:** Baf, Bafilomycin A<sub>1</sub>; LC3, Microtubule-associated protein light chain 3;

35 mTOR, mechanistic target of rapamycin

## 36 **Introduction**

37 Macroautophagy (hereafter, autophagy) is an intracellular degradative pathway, conserved  
38 from yeast to human. It occurs at a basal level to maintain cellular homeostasis, and is  
39 upregulated during starvation and disease conditions [1]. Recent studies have shown that  
40 pharmacological modulation of autophagy holds tremendous therapeutic potential for disease  
41 conditions such as neurodegeneration and cancer [2], and hence identification of autophagy  
42 modulating drugs/compounds is an active area of research [3].

43 The measurement of autophagy is done by monitoring the lipidated levels of microtubule-  
44 associated protein light chain 3 (LC3) protein that specifically incorporates into  
45 autophagosomes. Other techniques involve direct visualization of autophagosomes through  
46 fluorescence or electron microscopy. The degradative capacity of the pathway or autophagy  
47 flux is analysed by using specific inhibitors of autophagosome-lysosome fusion either  
48 through western blotting for LC3-II levels or by using ratiometric fluorescence based assays  
49 [4-6]. These have been further developed for high throughput platforms and can enable  
50 testing the autophagy capacity of several thousand compounds. A series of image based high  
51 throughput screening studies using probes such as mRFP-GFP-LC3, GFP-LC3-RFP-LC3ΔG,  
52 GFP-LC3-RFP etc. have identified autophagy inducers with broad translation potential [6-  
53 10].

54 Here we have developed an image-based high content quantitative assay using the human  
55 melanoma A375 cell line stably expressing the fluorescent probe GFP-LC3-RFP [6]. In a  
56 primary screening of the Microsource spectrum library, several autophagy flux inducers and  
57 inhibitors were identified by low and high GFP/RFP signal ratios respectively. Three drugs  
58 widely used in skin-care products Avobenzone, Guaiazulene and Tioxolone, were further  
59 validated for their autophagy inducing properties.

60

## 61 **Results**

### 62 **Generation and validation of A375 cell line stably expressing autophagy flux probe**

63 Studies have established that the GFP-LC3-RFP probe is a powerful tool for measurements of  
64 autophagy flux [5,6,11]. This protein is cleaved by the cellular cysteine protease ATG4, into  
65 two equimolar fragments of GFP-LC3 and RFP. The GFP-LC3 is lipidated with  
66 phosphatidylethanolamine (PE) at the terminal glycine residue, resulting in its incorporation  
67 into autophagosomes. Depending on the status of autophagy in the cell, the levels of GFP-  
68 LC3 change, while the RFP serves as an internal control (Fig 1A). The ratiometric  
69 measurements of GFP/RFP relative to a basal/untreated condition are an accurate reflection  
70 of autophagy induction or inhibition in the cell (Fig 1A) [6,12].

71 We generated a stable human melanoma A375 cell line expressing this autophagy flux probe  
72 (Fig 1B). Positive clones were validated, and one clone for chosen for further studies. The  
73 GFP-LC3 expression was detected using both GFP and LC3 antibodies (Fig 1B). Roughly  
74 equal levels of RFP were also seen (Fig 1B). Fluorescence images showed that the clone  
75 expressed GFP-LC3 and showed punctate distribution in the cell corresponding to  
76 autophagosomes, while diffuse RFP staining was observed throughout the cytosol (Fig 1C,  
77 upper panel). Non-toxic concentrations of Torin1 (autophagy inducer), and Bafilomycin A<sub>1</sub>  
78 (Baf) (autophagosome-lysosome fusion inhibitor), were determined (Fig S1A-B). Treatment  
79 of these cells with Torin1, resulted in a clear reduction in GFP-fluorescence in these cells,  
80 while treatment with Baf showed enhanced GFP intensity (Fig 1C). GFP/RFP ratios in the  
81 Torin1 and Baf treated cells were normalized to DMSO treated cells. Torin1 treatment  
82 showed a clear reduction of GFP/RFP ratio indicative of high autophagy flux, while Baf  
83 showed an enhanced ratio indicative of low autophagy flux (Fig 1D). These data established  
84 the validity of this cell line for autophagy flux measurements.

### 85 **Establishment of a high content screening platform**

86 This cell line was next tested in a high throughput 96 well plate platform. Cells were treated  
87 with DMSO (control) or Torin1/ Baf, and images were acquired. As seen earlier through  
88 confocal microscopy, Torin1 and Baf treatment resulted in reduced and enhanced GFP/RFP  
89 ratios respectively (Fig 2A, S1C-D). Based on values obtained with Torin1 and Baf, we  
90 established a cut off limit of <0.8 for autophagy inducers and >1.2 for autophagy inhibitors  
91 (Fig 2B). Using this technique, we screened the Spectrum library of 2560 compounds at 10  
92  $\mu$ M concentration. Control, Torin1, Baf, and drug treatments were given for 12 h. The  
93 cytotoxicity of the drug treatment was established through DAPI staining compared to  
94 untreated controls as described in the methods section (Data Sheet S1). Based on the  
95 GFP/RFP ratios, we identified 104 drugs that changed the cellular autophagy levels (Fig 2C-  
96 D, Fig S2, File S1). The autophagy inducers (Fig 2C) and inhibitors (Fig 2D) were classified  
97 based on their reported biological activities in literature. Of these 53 drugs have been  
98 previously established as autophagy inducers in literature [6,7,9]. We further identified 31  
99 novel autophagy inducers and 19 novel autophagy inhibitors (File S1).

#### 100 **Avobenzone, Guaiazulene and Tioxolone identified as potent autophagy inducers**

101 Of the shortlisted drugs, we focused our attention on three FDA-approved drugs that are  
102 widely used in skin-care products: Avobenzone, Guaiazulene and Tioxolone. All the drugs  
103 were retested for toxicity (Fig 3A), and showed GFP/RFP ratios comparable to Torin1 (Fig  
104 3B, C), identifying them as potent autophagy inducers. We also checked these drugs with the  
105 ptfLC3 reporter [5], and observed an increase in the number of autophagosomes  
106 (mRFP<sup>+</sup>/GFP<sup>+</sup>) and autolysosomes (mRFP<sup>+</sup>/GFP<sup>+</sup>) on drug treatment, that was comparable to  
107 Torin1 (Fig S3). Lysosome acidification was checked with the LysoSensor Yellow- Blue  
108 assay [13], and was found to be similar to Torin1 treatment (Fig S4). We further validated  
109 autophagy induction through western blotting for LC3. All the drugs showed enhanced LC3-  
110 II levels (Fig 4A-C). By using Baf we confirmed that LC3-II accumulation caused by these

111 drugs was due to autophagy induction and not due to blockage of autophagosome-lysosome  
112 fusion (Fig 4A-C). Levels of p62 clearance were also assessed through western blotting and  
113 these showed a reduction compared to DMSO treatment (Fig 4D-E), but did not have any  
114 effect on p62 mRNA levels (Fig 4F). We also tested if these drugs acted in an mTOR  
115 dependent manner by checking phosphorylation levels of S6 kinase (S6K) and eukaryotic  
116 translation initiation factor 4E-binding protein 1 (4E-BP1). While Torin1 resulted in efficient  
117 dephosphorylation of S6K and 4E-BP1, these drugs had no effect on phosphorylation of S6K  
118 and 4E-BP1 (Fig 4G-H), suggesting that their mode of action is mTOR independent.

## 119 **Discussion**

120 Autophagy research has rapidly evolved and interest has heightened on examining the  
121 potential of novel/existing drugs to modulate autophagy [14]. Autophagy modulation is likely  
122 to have therapeutic benefits in several disease conditions [15]. Conversely, several FDA-  
123 approved drugs could be autophagy modulators but have not been studied from this  
124 perspective.

125 In our current study, we developed a reporter cell line for high throughput measurements of  
126 autophagy flux, and identified several known and novel autophagy modulators in the  
127 Spectrum collection library of 2560 compounds. Our primary screening and validation  
128 showed that three FDA-approved drugs that are widely used in skin-care preparations:  
129 avobenzone, guaiazulene, and tioxolone can efficiently induce autophagy flux in an mTOR  
130 independent manner.

131 Avobenzone (butyl methoxydibenzoylmethane; parsol 1789) is an ultraviolet A absorber  
132 widely used in sunscreens [16-22]. Studies have shown that avobenzone can efficiently  
133 penetrate the stratum corneum and viable epidermis [23]. It has been shown to protect against  
134 UVA-induced melanogenesis through indirect regulatory effect on the Nrf2-ARE pathway  
135 [24]. It has also been shown to inhibit the proliferation of human trophoblasts, enhance Akt  
136 and ERK1/2 activity and induce mitochondrial membrane depolarization [25]. In normal  
137 human epidermal keratinocytes, it can downmodulate lipid metabolism, and Peroxisome  
138 proliferator-activated receptor-gamma signaling [26], and can induce keratinocyte derived  
139 Vascular endothelial growth factor production [27]. Its autophagy inducing properties have  
140 not been described till date, however based on the above-mentioned studies, it is likely that  
141 autophagy will play an important role in the mode of action of avobenzone.

142 Guaiazulene (1,4-dimethyl-7-isopropylazulene), is a natural azulenic compound widely used  
143 in cosmetic and health-care products and in pharmaceutical preparations such as creams and

144 toothpastes [28,29]. Its early use was as an ophthalmic drug, and later it became a popular skin  
145 conditioning agent. The drug was also shown to be promising for the treatment of gastritis  
146 and peptic ulcers [30]. Studies have shown that it can act in a synergic manner with  
147 diclofenac and can have therapeutic advantages for the clinical treatment of inflammatory  
148 pain [31]. It has also been shown to have anti-cancer properties [32]. A recent study showed  
149 that guaiazulene inhibited Akt/mTOR signalling and induced autophagosome formation [33].  
150 However, this study used a very high concentration of guaiazulene (100/150  $\mu$ M), which  
151 might account for the observed mTOR inhibition.

152 Tioxolone (6-Hydroxy-2H-1,3-benzoxathiol-2-one) is used for cosmetics products such as  
153 hair shampoos, skin cleansers and acne treatment products [34]. It has anti-fungal, anti-  
154 bacterial, anti-inflammatory and anti-tumorigenic effects, and has been shown to be an  
155 inhibitor of human carbonic anhydrase II [35,36]. Tincture of thioxolone plus benzoxonium  
156 chloride was shown to be useful for the treatment of cutaneous leishmaniasis [37].

157 In summary, our high throughput screening approach has identified several novel autophagy  
158 inducers and inhibitors. We also validate that three widely used drugs in skin-care products  
159 are potent autophagy inducers. Further studies will highlight if the autophagy inducing  
160 properties of these drugs govern their mode of action.



## 161 **Materials and Methods**

### 162 **Cell lines**

163 A375 and HEK293T cells were obtained from the Cell Repository at the National Centre for  
164 Cell Sciences, Pune, India. Cells were grown in Dulbecco's modified Eagle's medium  
165 (DMEM) (HiMedia, AL007A) supplemented with 10% fetal bovine serum (FBS) (HiMedia,  
166 RM10432), 100 µg/ml penicillin-streptomycin, 2 mM L-glutamine and 1x MEM Non-  
167 Essential Amino Acids Solution (HiMedia, ACL006).

### 168 **Reagents, antibodies and plasmids**

169 The following reagents were used in the study: Torin1 (Tocris Bioscience, 4247),  
170 Bafilomycin (Baf)-A1 (Sigma-Aldrich, B1793-10UG), PMSF (Sigma-Aldrich, P7626-100G),  
171 Protease inhibitor cocktail (Sigma-Aldrich, 11697498001), LysoSensor Yellow/Blue DND-  
172 160 (Thermo Fisher Scientific, L7545). The Spectrum collection library (MicroSource  
173 Discovery Systems, Inc., SP170615) comprising of 2560 compounds including bioactive  
174 molecules, natural products, and FDA-approved compounds was used for image based high  
175 content screening. The following antibodies were used in the study: GAPDH (14C10);  
176 Phospho-4E-BP (Thr37/46) (2855S); 4E-BP (9644S); Phospho-p70 S6 Kinase (Thr389)  
177 (97596S) and p70 S6 Kinase (2708S) from Cell Signalling Technology, LC3 (ab51520); RFP  
178 (ab62341), GFP (ab32146) and SQSTM1/p62 (ab56416) from Abcam, HRP-conjugated  
179 secondary antibodies from Jackson ImmunoResearch Laboratories. The following plasmids  
180 were obtained from Addgene: gag/pol (14887, Tannishtha Reya) [38], pCI-VSVG (1733,  
181 Garry Nolan) [39], pMRX-IP-GFP-LC3-RFP (84573, Noboru Mizushima) [6], and ptfLC3  
182 (21074, Tamotsu Yoshimori) [10]. The following primers (5'-3') were used in the study  
183 GAPDH: F-TGCACCACCAACTGCTTAGC, R-GGCATGGACTGTGGTCATGAG;  
184 P62/SQSTM1: F-AGGCGCACTACCGCGAT, R-CGTCACTGGAAAAGGCAACC.

### 185 **Stable cell line generation**

186 HEK293T cells were co-transfected with gag/pol, pCI-VSVG and pMRX-IP-GFP-LC3-RFP  
187 plasmids using Lipofectamine 2000 and incubated at 37°C for 24 h. The supernatant was  
188 harvested for retrovirus, and was used to transduce A375 cells. Puromycin selection (2  
189 µg/ml) was given after 48 h. After one week of selection, cells were trypsinized and 10,000  
190 cells were serially diluted to achieve single cell seeding per well of a 96 well-plate. Isolated  
191 colonies were visible by 14 days, and were tested for the expression of GFP, RFP and  
192 autophagy flux using Torin1 and Baf treatments. One clone was chosen for further studies.

### 193 **Drug treatment & confocal imaging**

194 Stable GFP-LC3-RFP A375 cells or A375 cells transiently transfected with ptfLC3, were  
195 treated with Torin1 (1 µM/ 6h; 100 nM/ 12h) or Baf (100 nM/ 6h; 20 nM/ 12h) or  
196 DMSO/Avobenzonone/ Guaiazulene Tioxolone (10 µM) for 12 h. For confocal microscopy all  
197 cells were grown on glass coverslips. GFP/RFP intensity ratio per cell was calculated and  
198 normalized to DMSO control treated cells. For ptfLC3 experiments, autophagosomes  
199 (RFP<sup>+</sup>/GFP<sup>+</sup> structures) and autolysosomes (RFP<sup>+</sup>/GFP<sup>-</sup> structures) per cell were counted  
200 using Spot to Spot colocalization analysis in Imaris 8.

### 201 **High content imaging and analysis**

202 For image based high content screening 15,000 cells/well were seeded in Corning 96 well  
203 black polystyrene microplates (Corning, CLS3603). Torin1 (100 nM), Baf (20 nM), and drug  
204 (10 µM) treatment was given for 12 h. All drugs were tested in biological duplicates or  
205 triplicates. Cells were fixed and stained with DAPI. Images were acquired on ImageXpress  
206 Micro Confocal High-Content Imaging System (Molecular Devices, USA) using FITC,  
207 Texas red, and DAPI channels with a 10 X objective lens. A total of 16 fields per well were  
208 acquired and this covered the entire well area. Analysis was performed using the multi-  
209 wavelength cell scoring module of the MetaXpress Software. To calculate drug cytotoxicity,  
210 total nuclei were counted using DAPI in drug and DMSO treated wells. Any drug showing

211 more than 20% reduction in total nuclei was considered as toxic and excluded from further  
212 analysis. Only triple positive cells (DAPI, GFP, RFP) were used for quantitation. The integral  
213 intensity of GFP and RFP per well was calculated and used to estimate the GFP/RFP ratio.  
214 The values obtained for DMSO treatment were used for normalization. The GFP/RFP ratio in  
215 Torin1 treatment gave a mean value of 0.68, while BafA1 treatment gave a mean value of  
216 1.2. Any drug showing a GFP/RFP ratio  $<0.8$  was considered as an autophagy inducer, and  
217 GFP/RFP ratio  $>1.2$  was marked as autophagy flux inhibitor.

### 218 **Western blotting**

219 After drug treatment A375 cells were washed with PBS and lysed using cell lysis buffer [150  
220 mM NaCl, 1% Triton X-100, 50 mM Tris-HCl (pH 7.5), 200  $\mu$ M PMSF and protease  
221 inhibitor cocktail]. Protein quantification was done using BCA assay (G-Bioscience, 786-  
222 570) kit. Cell lysates were separated on polyacrylamide gels and transferred to a PVDF  
223 membrane for immunoblotting using specific primary and secondary antibodies. Western blot  
224 images were processed using ImageJ (NIH, USA) software for quantitation of band  
225 intensities. Data are represented as mean  $\pm$  SD from three independent experiments.

### 226 **LysoSensor Yellow- Blue assay**

227 The LysoSensor Yellow-Blue assay was performed as described in [13]. A375 cells were  
228 were grown on glass coverslips, and were treated with DMSO (control), Torin1 (1  $\mu$ M) or  
229 Baf (100 nM) or Avobenzone/ Guaiazulene Tioxolone, followed by incubation with 10  $\mu$ M  
230 LysoSensor for 5 min. Cells were then washed with ice-cold PBS three times and fixed using  
231 4% PFA. Cells were imaged on LSM 880, Carl Zeiss, with excitation wavelength range 371-  
232 405 nm and emission wavelength range 420-650 nm. The LysoSensor dye has dual-emission  
233 peaks of 440 nm (blue in less acidic organelles) and 540 nm (yellow in more acidic  
234 organelles). Yellow fluorescence per cell was quantified and normalized to DMSO treated  
235 control.

236 **Cell viability assay**

237 A375 cells were seeded at a density of 15000 cells/well in 96-well plates. After 24 h, cells  
238 were treated with indicated concentrations of Torin1/ Baf/ Avobenzone/ Guaiazulene  
239 Tioxolone for 6 or 12 h. The cytotoxicity assay was performed using CellTiter-Glo kit  
240 (Promega, G7572). Percentage of cell viability was measured relative to DMSO treated cells.

241 **Statistical analysis**

242 Statistical analysis of the data was performed using one-way ANOVA and differences were  
243 considered significant at values of  $*P < 0.05$ ,  $**P < 0.01$ ,  $***P < 0.001$ ,  $**** P < 0.0001$

244 **Conflict of interest**

245 The authors have no conflict of interest to declare

246

247 **Acknowledgements**

248 High content screening was performed at the Advanced Technology Platform Centre (ATPC)

249 at RCB. We are thankful to Dr. Nirpendra Singh, Ashish Pandey and Rajan for technical

250 support. Simran Chhabra and all other Virology lab members are acknowledged for their

251 support and suggestions.

252

253 **Funding**

254 This work was supported by a grant from DBT BT/PR27875/Med/29/1302/2018, and from

255 DBT intra-mural funds to RCB. SKP is supported by a DBT-SRF fellowship. PS is supported

256 by UGC-SRF fellowship.

257 **References:**

- 258 1. Mizushima N, Levine B, Cuervo AM, et al. Autophagy fights disease through cellular  
259 self-digestion. *Nature*. 2008 Feb 28;451(7182):1069-75.
- 260 2. Vakifahmetoglu-Norberg H, Xia HG, Yuan J. Pharmacologic agents targeting  
261 autophagy. *The Journal of clinical investigation*. 2015 Jan;125(1):5-13.
- 262 3. Choi AM, Ryter SW, Levine B. Autophagy in human health and disease. *The New*  
263 *England journal of medicine*. 2013 Feb 14;368(7):651-62.
- 264 4. Klionsky DJ, Abdel-Aziz AK, Abdelfatah S, et al. Guidelines for the use and  
265 interpretation of assays for monitoring autophagy (4th edition)(1). *Autophagy*. 2021  
266 Jan;17(1):1-382.
- 267 5. Mizushima N, Yoshimori T, Levine B. Methods in mammalian autophagy research.  
268 *Cell*. 2010 Feb 5;140(3):313-26.
- 269 6. Kaizuka T, Morishita H, Hama Y, et al. An Autophagic Flux Probe that Releases an  
270 Internal Control. *Molecular cell*. 2016 Nov 17;64(4):835-849.
- 271 7. Chauhan S, Ahmed Z, Bradfute SB, et al. Pharmaceutical screen identifies novel  
272 target processes for activation of autophagy with a broad translational potential.  
273 *Nature communications*. 2015 Oct 27;6:8620.
- 274 8. Li Y, McGreal S, Zhao J, et al. A cell-based quantitative high-throughput image  
275 screening identified novel autophagy modulators. *Pharmacological research*. 2016  
276 Aug;110:35-49.
- 277 9. Zhang L, Yu J, Pan H, et al. Small molecule regulators of autophagy identified by an  
278 image-based high-throughput screen. *Proceedings of the National Academy of*  
279 *Sciences of the United States of America*. 2007 Nov 27;104(48):19023-8.

- 280 10. Kimura S, Noda T, Yoshimori T. Dissection of the autophagosome maturation  
281 process by a novel reporter protein, tandem fluorescent-tagged LC3. *Autophagy*. 2007  
282 Sep-Oct;3(5):452-60.
- 283 11. Geng J, Klionsky DJ. Direct quantification of autophagic flux by a single molecule-  
284 based probe. *Autophagy*. 2017 Apr 3;13(4):639-641.
- 285 12. Huang L, Fu Q, Dai J-M, et al. High-content screening of diterpenoids from *Isodon*  
286 species as autophagy modulators and the functional study of their antiviral activities.  
287 *Cell Biology and Toxicology*. 2021 2021/01/23.
- 288 13. Albrecht LV, Tejada-Muñoz N, De Robertis EM. Protocol for Probing Regulated  
289 Lysosomal Activity and Function in Living Cells. *STAR protocols*. 2020 Dec  
290 18;1(3):100132.
- 291 14. Kataura T, Tashiro E, Nishikawa S, et al. A chemical genomics-aggrephagy  
292 integrated method studying functional analysis of autophagy inducers. *Autophagy*.  
293 2021 Aug;17(8):1856-1872.
- 294 15. Yao RQ, Ren C, Xia ZF, et al. Organelle-specific autophagy in inflammatory  
295 diseases: a potential therapeutic target underlying the quality control of multiple  
296 organelles. *Autophagy*. 2021 Feb;17(2):385-401.
- 297 16. Callen JP, Roth DE, McGrath C, et al. Safety and efficacy of a broad-spectrum  
298 sunscreen in patients with discoid or subacute cutaneous lupus erythematosus. *Cutis*.  
299 1991 Feb;47(2):130-2, 135-6.
- 300 17. Hanson KM, Clegg RM. Bioconvertible vitamin antioxidants improve sunscreen  
301 photoprotection against UV-induced reactive oxygen species. *Journal of cosmetic*  
302 *science*. 2003 Nov-Dec;54(6):589-98.
- 303 18. Chatelain E, Gabard B. Photostabilization of butyl methoxydibenzoylmethane  
304 (Avobenzone) and ethylhexyl methoxycinnamate by bis-ethylhexyloxyphenol

- 305 methoxyphenyl triazine (Tinosorb S), a new UV broadband filter. *Photochemistry and*  
306 *photobiology*. 2001 Sep;74(3):401-6.
- 307 19. Gonzaga ER. Role of UV light in photodamage, skin aging, and skin cancer:  
308 importance of photoprotection. *American journal of clinical dermatology*. 2009;10  
309 Suppl 1:19-24.
- 310 20. Wang SQ, Stanfield JW, Osterwalder U. In vitro assessments of UVA protection by  
311 popular sunscreens available in the United States. *Journal of the American Academy*  
312 *of Dermatology*. 2008 Dec;59(6):934-42.
- 313 21. Beasley DG, Meyer TA. Characterization of the UVA protection provided by  
314 avobenzone, zinc oxide, and titanium dioxide in broad-spectrum sunscreen products.  
315 *American journal of clinical dermatology*. 2010 Dec 1;11(6):413-21.
- 316 22. Kockler J, Robertson S, Oelgemöller M, et al. Butyl methoxy dibenzoylmethane.  
317 *Profiles of drug substances, excipients, and related methodology*. 2013;38:87-111.
- 318 23. Hayden CG, Cross SE, Anderson C, et al. Sunscreen penetration of human skin and  
319 related keratinocyte toxicity after topical application. *Skin pharmacology and*  
320 *physiology*. 2005 Jul-Aug;18(4):170-4.
- 321 24. Chaiprasongsuk A, Onkoksoong T, Pluemsamran T, et al. Photoprotection by dietary  
322 phenolics against melanogenesis induced by UVA through Nrf2-dependent  
323 antioxidant responses. *Redox biology*. 2016 Aug;8:79-90.
- 324 25. Yang C, Lim W, Bazer FW, et al. Avobenzone suppresses proliferative activity of  
325 human trophoblast cells and induces apoptosis mediated by mitochondrial disruption.  
326 *Reproductive toxicology (Elmsford, NY)*. 2018 Oct;81:50-57.
- 327 26. Ahn S, An S, Lee M, et al. A long-wave UVA filter avobenzone induces obesogenic  
328 phenotypes in normal human epidermal keratinocytes and mesenchymal stem cells.  
329 *Archives of toxicology*. 2019 Jul;93(7):1903-1915.



- 330 27. Bae ON, Ahn S, Jin SH, et al. Chemical allergens stimulate human epidermal  
331 keratinocytes to produce lymphangiogenic vascular endothelial growth factor.  
332 Toxicology and applied pharmacology. 2015 Mar 1;283(2):147-55.
- 333 28. Fiori J, Gotti R, Albin A, et al. Study on the photostability of guaiazulene by high-  
334 performance liquid chromatography/mass spectrometry and gas chromatography/mass  
335 spectrometry. Rapid communications in mass spectrometry : RCM. 2008  
336 Sep;22(17):2698-706.
- 337 29. Fiori J, Gotti R, Valgimigli L, et al. Guaiazulene in health care products:  
338 determination by GC-MS and HPLC-DAD and photostability test. J Pharm Biomed  
339 Anal. 2008 Aug 5;47(4-5):710-5.
- 340 30. Okabe S, Takeuchi K, Mori Y, et al. [Effects of KT1-32 on acute gastric lesions and  
341 duodenal ulcers induced in rats]. Nihon Yakurigaku Zasshi. 1986 Dec;88(6):467-76.
- 342 31. Ortiz MI, Fernandez-Martinez E, Soria-Jasso LE, et al. Isolation, identification and  
343 molecular docking as cyclooxygenase (COX) inhibitors of the main constituents of  
344 Matricaria chamomilla L. extract and its synergistic interaction with diclofenac on  
345 nociception and gastric damage in rats. Biomed Pharmacother. 2016 Mar;78:248-256.
- 346 32. Teratani M, Nakamura S, Sakagami H, et al. Antitumor Effects and Tumor-specificity  
347 of Guaiazulene-3-Carboxylate Derivatives Against Oral Squamous Cell Carcinoma In  
348 Vitro. Anticancer Res. 2020 Sep;40(9):4885-4894.
- 349 33. Ye Q, Zhou L, Jin P, et al. Guaiazulene Triggers ROS-Induced Apoptosis and  
350 Protective Autophagy in Non-small Cell Lung Cancer. Front Pharmacol.  
351 2021;12:621181.
- 352 34. Tao Y, Wang Q, Sun K, et al. The molecular structure, spectroscopic features and  
353 electronic properties of tioxolone under the external electric field. Spectrochimica  
354 acta Part A, Molecular and biomolecular spectroscopy. 2020 Apr 15;231:118108.

- 355 35. Iyer R, Barrese AA, 3rd, Parakh S, et al. Inhibition profiling of human carbonic  
356 anhydrase II by high-throughput screening of structurally diverse, biologically active  
357 compounds. *Journal of biomolecular screening*. 2006 Oct;11(7):782-91.
- 358 36. Barrese AA, 3rd, Genis C, Fisher SZ, et al. Inhibition of carbonic anhydrase II by  
359 thioxolone: a mechanistic and structural study. *Biochemistry*. 2008 Mar  
360 11;47(10):3174-84.
- 361 37. Daie Parizi MH, Karvar M, Sharifi I, et al. The topical treatment of anthroponotic  
362 cutaneous leishmaniasis with the tincture of thioxolone plus benzoxonium chloride  
363 (Thio-Ben) along with cryotherapy: a single-blind randomized clinical trial. *Dermatol*  
364 *Ther*. 2015 May-Jun;28(3):140-6.
- 365 38. Reya T, Duncan AW, Ailles L, et al. A role for Wnt signalling in self-renewal of  
366 haematopoietic stem cells. *Nature*. 2003 May 22;423(6938):409-14.
- 367 39. Zhang P, Rausch C, Hastert FD, et al. Methyl-CpG binding domain protein 1  
368 regulates localization and activity of Tet1 in a CXXC3 domain-dependent manner.  
369 *Nucleic acids research*. 2017 Jul 7;45(12):7118-7136.
- 370

371 **Figure Legends**

372 **Figure 1. Development of GFP-LC3-RFP cell-line for autophagy flux assays.** (A)

373 Schematic representation of the autophagy flux measurement assay using the GFP-LC3-RFP  
374 fluorescent probe. (B) The stable A375 (GFP-LC3-RFP) clone was analysed by western  
375 blotting using GFP, RFP and LC3 antibodies. Cleavage of the GFP-LC3 from the RFP  
376 fragment is observed. Endogenous LC3 bands can be seen in a higher exposure (H.E) blot on  
377 the extreme right (C) A375 (GFP-LC3-RFP) cells were treated with DMSO or autophagy  
378 inducer Torin1 (1  $\mu$ M) or inhibitor Baf (100 nM) for 6 h. Cells were imaged on a confocal  
379 microscope. Scale bar 200  $\mu$ m. (D) GFP/RFP intensity ratios were measured from 20-30 cells  
380 from two independent coverslips and normalized to DMSO control. One-way ANOVA was  
381 used to determine statistical significance, \*\*\* $P < 0.001$ , \*\*\*\* $P < 0.0001$

382 **Figure 2. High throughput imaging screen of Microsource spectrum library.** (A) The

383 Microsource spectrum library consisting of 2560 drugs were screened for the identification of  
384 autophagy flux modulators. A375 (GFP-LC3-RFP) cells were treated with DMSO/ Torin1  
385 (100 nM)/ Baf (20 nM)/ drugs (10  $\mu$ M) for 12 h in biological duplicates or triplicates. Images  
386 were acquired using the Image Xpress high content imaging system, and representative  
387 images are shown. Scale bar 100  $\mu$ m. (B) GFP/RFP ratios were measured and normalized to  
388 DMSO control. Values show relative GFP/RFP ratios from 3 independent experiments. (C-D)  
389 Venn diagram showing the categorical classification of different molecules identified as  
390 autophagy inducers (ratio  $< 0.8$ ) or inhibitors (ratio  $> 1.2$ ). One-way ANOVA was used to  
391 determine statistical significance, \*\*\*\* $P < 0.0001$

392 **Figure 3. Avobenzone, Guaiazulene and Tioxolone are autophagy inducers.** (A) Viability

393 measurements of A375 cells treated with Avobenzone/ Guaiazulene/ Tioxolone (10  $\mu$ M) for  
394 12 h. (B-C) A375 (GFP-LC3-RFP) cells were treated with DMSO, drugs (Torin1/ Baf) or  
395 Avobenzone/ Guaiazulene/ Tioxolone (n=3), and images were acquired using the Image

396 Xpress high content imaging system. The relative ratiometric quantitation of GFP/RFP  
397 normalized to DMSO control is plotted in (C). One-way ANOVA was used to determine  
398 statistical significance, \*\*\* $P < 0.001$ , \*\*\*\*  $P < 0.0001$ .

399 **Figure 4. Characterization of Avobenzone, Guaiazulene and Tioxolone as autophagy**  
400 **inducers.** (A-B) A375 cells were treated with the indicated drugs (10  $\mu$ M) for 10 h, followed  
401 by Baf treatment (100 nM) for 2 h before harvest and immunoblotted with LC3 and GAPDH  
402 antibodies. Increase in LC3-II levels on Baf treatment is indicative of functional autophagy  
403 flux. Numbers below the blot indicate ratio of LC3-II/GAPDH, calculated using Image J. (C)  
404 Bar graph shows relative quantitation of LC3 expression in Baf treated cells normalized to  
405 GAPDH from three independent experiments. (D-E) Cells were treated as described for panel  
406 A, and lysates were blotted for p62 and GAPDH. (E) Bar graph shows quantitation of p62  
407 levels normalized to GAPDH from three independent experiments. (F) Relative mRNA levels  
408 of p62 in cells treated as described above. (G-H) mTOR downstream signaling was checked  
409 by measuring the proteins level of p-T386S6K1, S6K1, p-4E-BP1(Thr37/46) and 4E-BP1  
410 antibodies. Torin1 treatment was used as a positive control. Data is representative of three  
411 independent experiments. One-way ANOVA was used to determine statistical significance,  
412 \* $P < 0.05$ , \*\* $P < 0.01$ , \*\*\*\* $P < 0.001$ .

**A**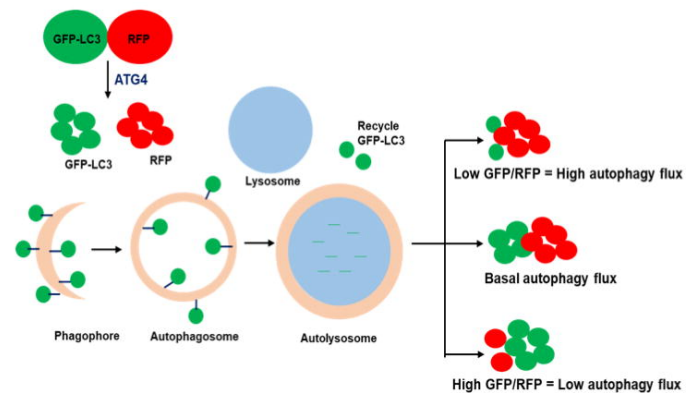**B**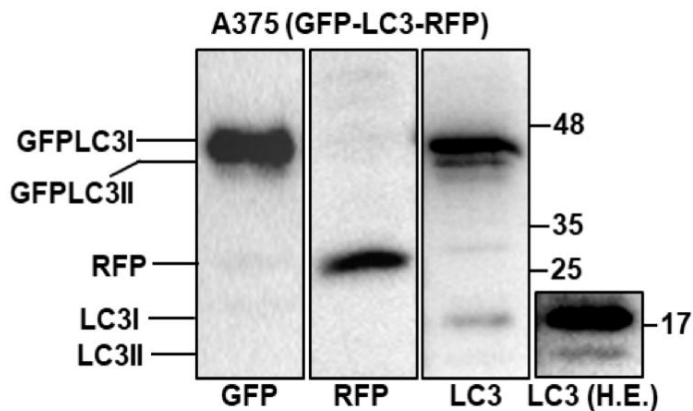**C**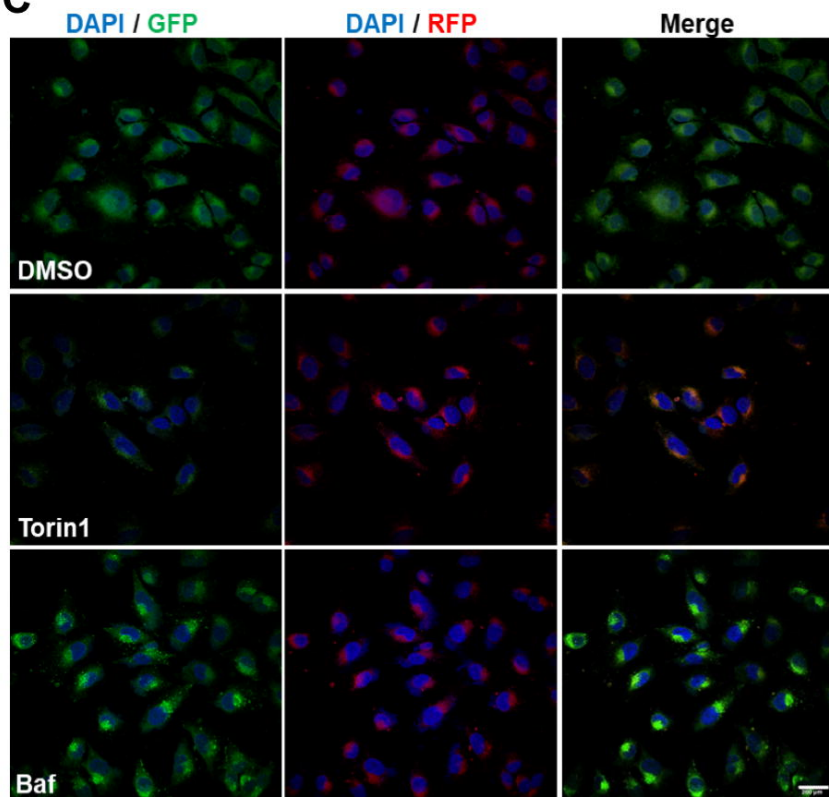**D**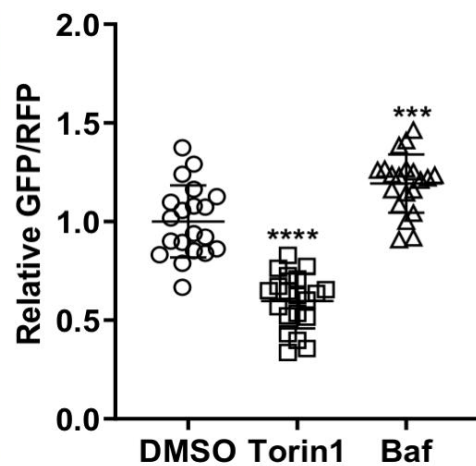

Fig1





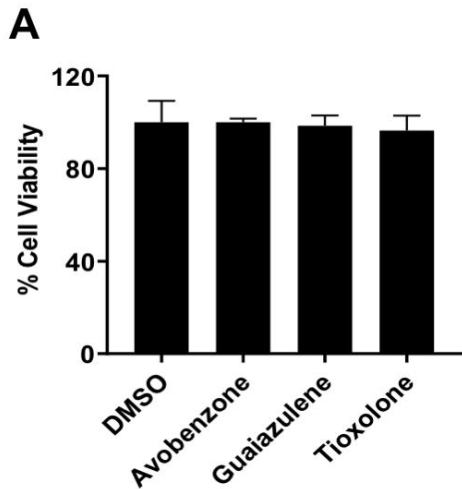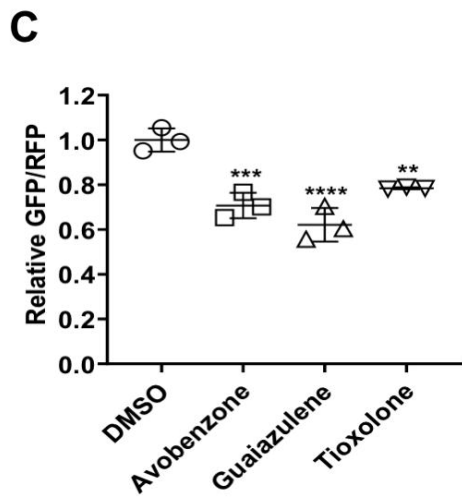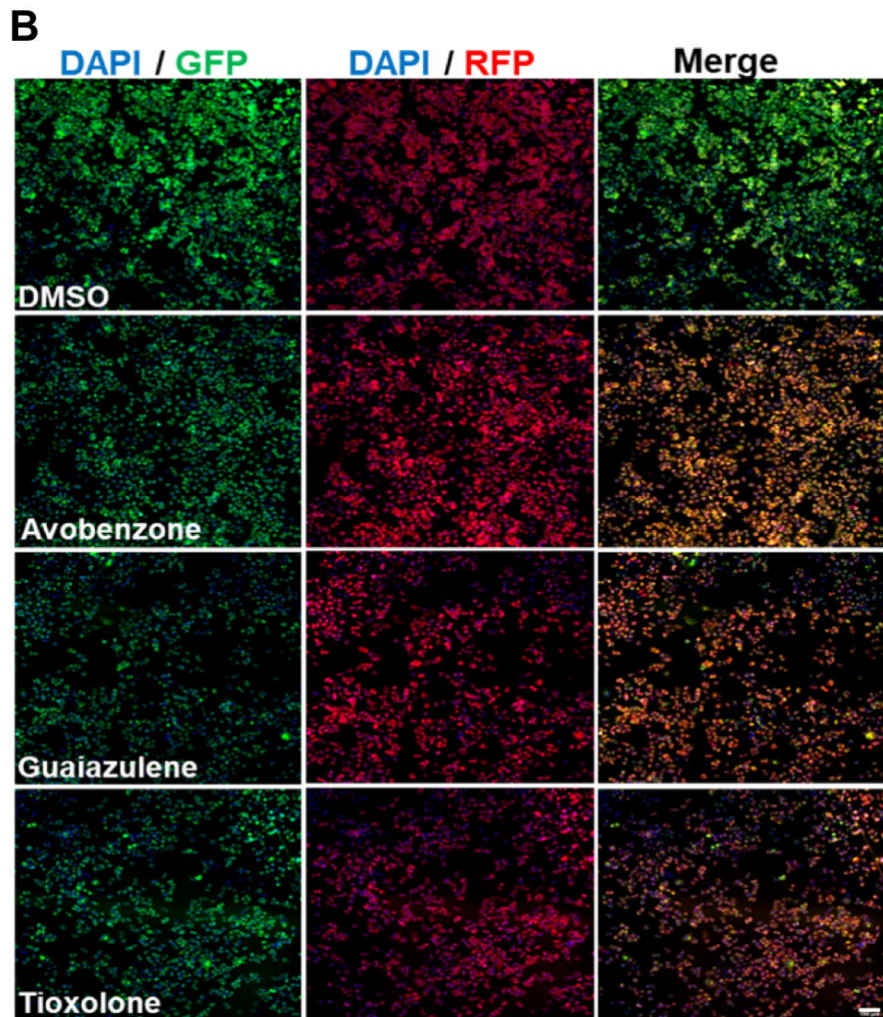

Fig3

**A**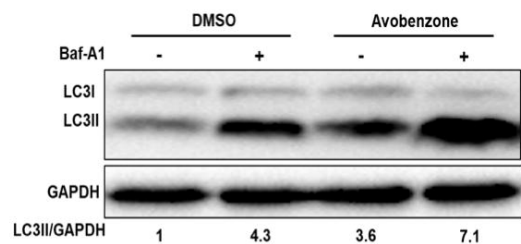**B**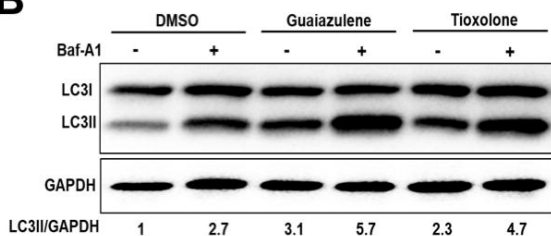**D**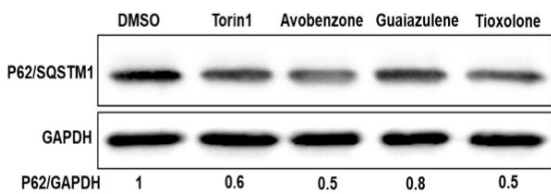**G**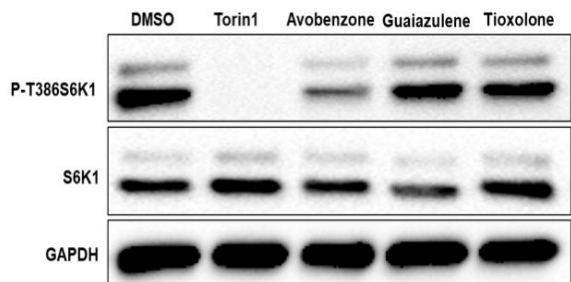**C**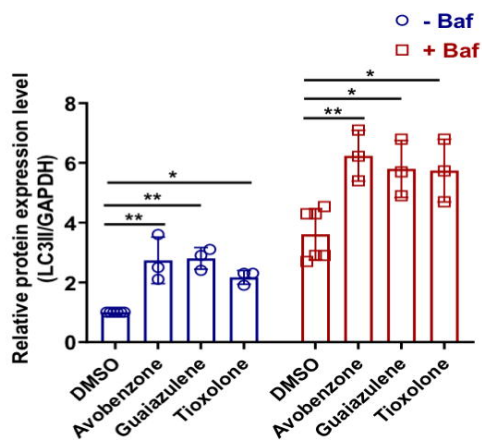**E**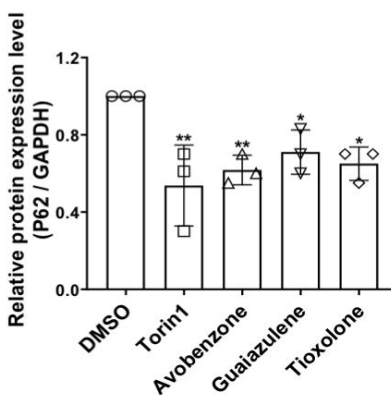**F**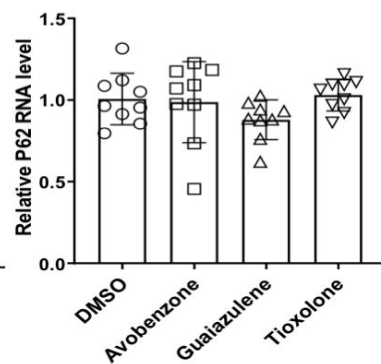**H**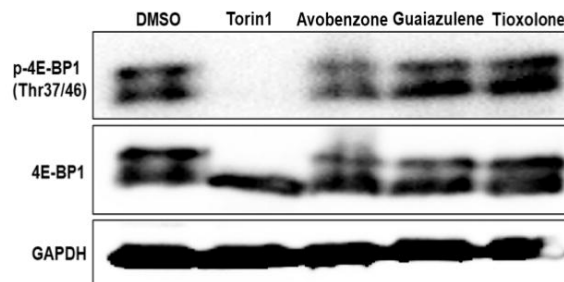**Fig4**
